# Supplementary material for: Development of a self-powered digital LAMP microfluidic chip (SP-dChip) for the detection of emerging viruses
Source: Royal Society of Chemistry journal article supplement (doi:10.1039/d4lc00265b), 2024-01-01
Supplement: d4lc00265b1.pdf [file d4lc00265b1.pdf]

## Supporting information

### Development of a self-powered digital microfluidic chip (SP-dChip) for the detection of emerging viruses

Tom Kasputis,<sup>a</sup> Po-Chen Yeh,<sup>b</sup> Li Liu,<sup>c</sup> Jeffrey Marano,<sup>d,e</sup> James Weger-Lucarelli,<sup>d</sup> Ke Du,<sup>c</sup> Liwei Lin,<sup>\*b</sup> and Juhong Chen<sup>\*a,f</sup>

<sup>a</sup> Department of Biological Systems Engineering, Virginia Tech, Blacksburg, VA, USA.

<sup>b</sup> Department of Mechanical Engineering, University of California, Berkeley, CA, USA. E-mail: lwlin@berkeley.edu

<sup>c</sup> Department of Chemical and Environmental Engineering, University of California, Riverside, CA, USA.

<sup>d</sup> Department of Biomedical Sciences and Pathobiology, Virginia Tech, Blacksburg, VA, USA.

<sup>e</sup> Department of Biomedical Science, Colorado State, Fort Collins, CO, USA.

<sup>f</sup> Department of Bioengineering, University of California, Riverside, CA, USA. E-mail: jchen@ucr.edu

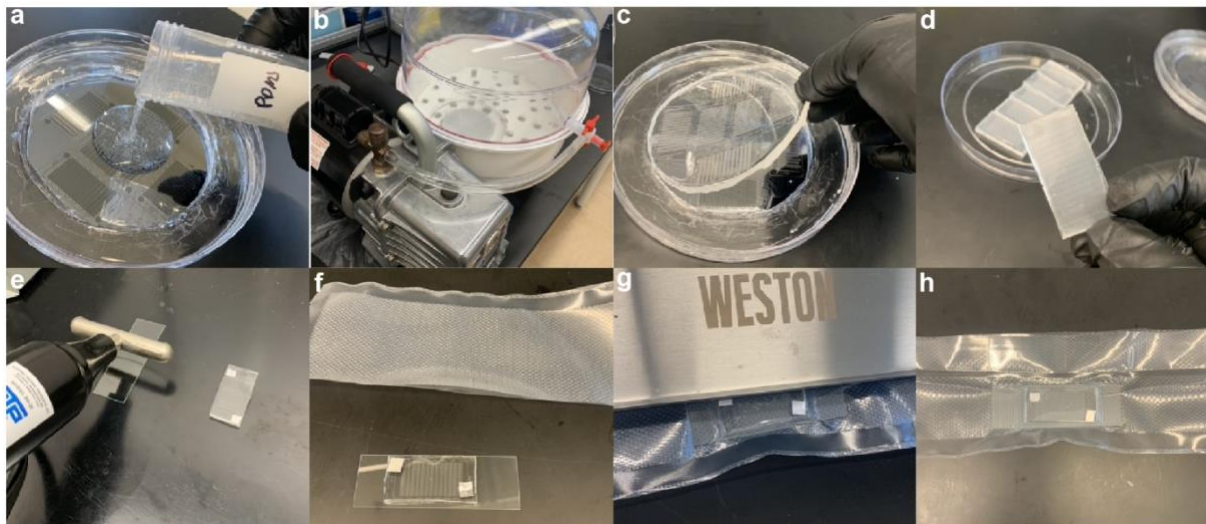

**Figure S1.** The fabrication and storage of microfluidic chips. (a) The PDMS elastomer and curing agent are mixed at a ratio of 10:1 and poured onto the master mold. (b) The PDMS is degassed using a vacuum pump. (c) After incubation, the PDMS slab is cut and removed. (d) Individual chips are excised and isolated. (e) Chips are bound to standard microscope slides via oxygen plasma treatment. (f) Vacuum-sealable bags are prepared for vacuum sealing. (g) The chips are vacuum sealed. (h) The chips are stored in vacuum-sealable bags until use.

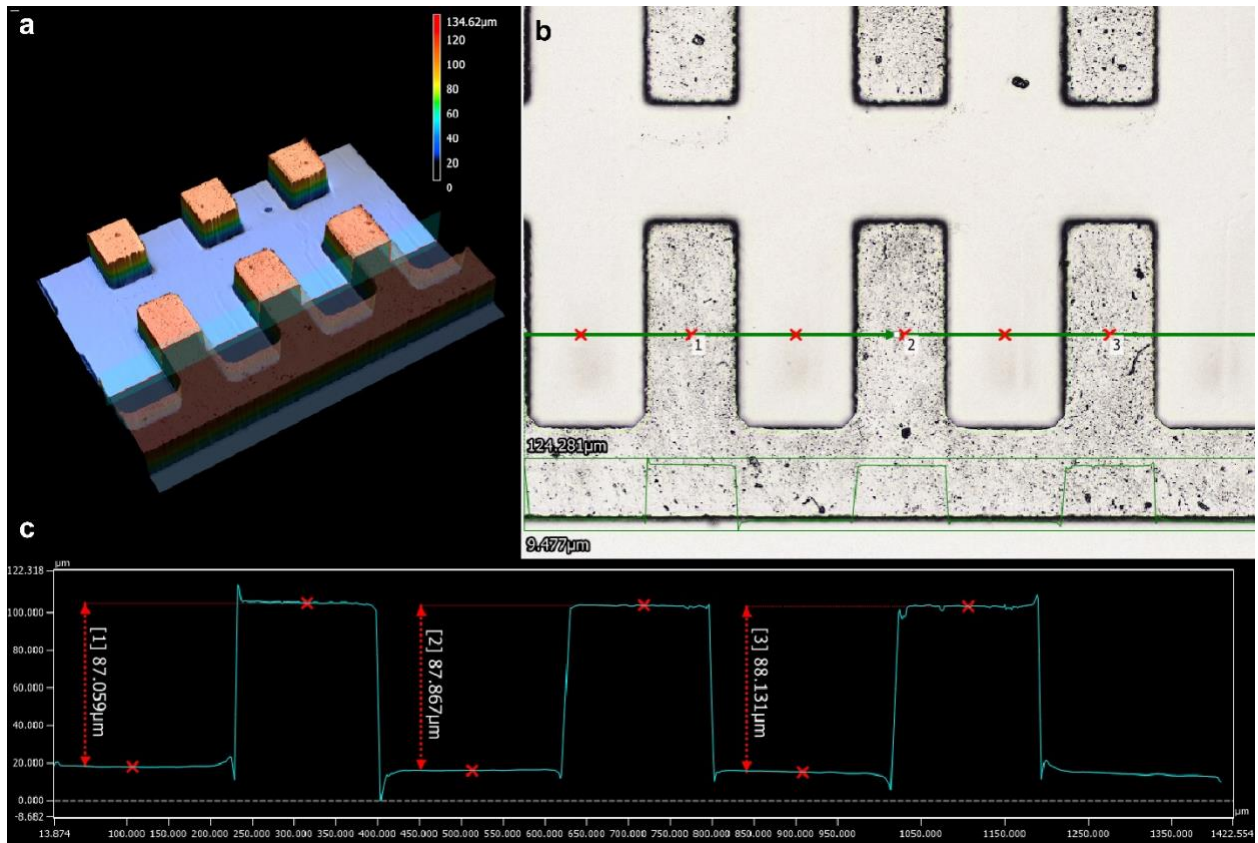

**Figure S2.** Dimensions and analysis of microfluidic wells. (a) 3D view and depth measurement of the microfluidic wells using a profilometer. (b) Top-down measurement of microfluidic well width. (c) Side-view measurement of the microfluidic well depth.

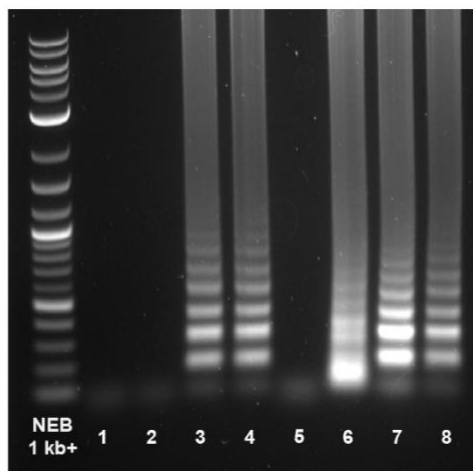

**Figure S3.** Optimization of four ZIKV LAMP primer sets. The tests were performed with a negative control (-) and  $10^3$  ZIKV RNAs (+). (1: Primer set P1 without target, 2: Primer set P1 with target, 3: Primer set P2 without target, 4: Primer set P2 with target, 5: Primer set P3 without target, 6: Primer set P3 with target, 7: Primer set P4 without target, 8: Primer set P4 with target)

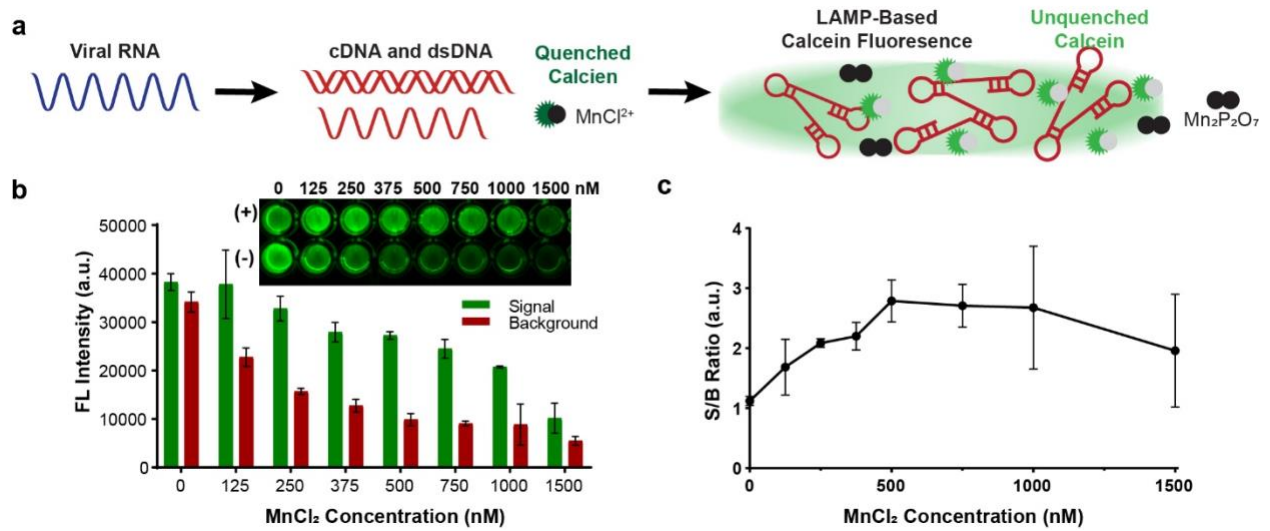

**Figure S4.** Optimization of calcein-based LAMP fluorescent assays. (a) Schematic illustration of calcein LAMP fluorescent method. (b) Photograph and fluorescent intensity of positive ZIKV LAMP amplification with  $10^3$  ZIKV RNAs (signal) and no amplification controls (background) using 12.5 nM calcein with varying concentrations of  $MnCl_2$ . (c) Signal/background ratio for the ZIKV LAMP amplification using 12.5 nM calcein with varying concentrations of  $MnCl_2$ .

**Table S1.** Oligonucleotide sequences used for the LAMP assays

| DNA Name            | Sequence (5'-to-3')                            |
|---------------------|------------------------------------------------|
| <b>LAMP Primers</b> |                                                |
| P1_ZIKV_FIP         | TCAGGCCAACAGCTGTGAGTACGACTGCTGTTGCTCACA        |
| P1_ZIKV_BIP         | CGCATTGGCTGGAGGGTTCGTGACAATTAGCAGACCGACC       |
| P1_ZIKV_F3          | GACCCCATCAACGTGGTG                             |
| P1_ZIKV_B3          | CCACACTCTTTCCTGAGACC                           |
| P1_ZIKV_LF          | CAGCTCCGCTTCCCACT                              |
| P1_ZIKV_LB          | AGGCAGATATAGAGATGGCTGG                         |
| P2_ZIKV_FIP         | GGCATGTGCGTCCCTTGAACCTGACACCGGAACTCCACACT      |
| P2_ZIKV_BIP         | AGAAGGAGCAGTTCACACGGCCCTTTGCACCATCCATCTC       |
| P2_ZIKV_F3          | TGGTTCACGACATTCCATT                            |
| P2_ZIKV_B3          | CATTTCAAGTGGCCAGAGGA                           |
| P2_ZIKV_LF          | ACCAGTGCTTCTTTGTTGTTCC                         |
| P2_ZIKV_LB          | CCTTGCTGGAGCTCTGGAG                            |
| P3_ZIKV_FIP         | CCTGAGGGGCATGTGCAAACCTAGAATGGCAGTCAGTGGAGAT    |
| P3_ZIKV_BIP         | ACCCTCAACTGGATGGGACAACCTGGAGCTTGTGTAAGTGGTG    |
| P3_ZIKV_F3          | CGGATGGGATAGGCTCAAAC                           |
| P3_ZIKV_B3          | ATGGACCTCCCGTCCTTG                             |
| P3_ZIKV_LF          | CATCAATTGGCTTCACAACGC                          |
| P3_ZIKV_LB          | GGGAAGAAGTTCGGTTTTGCTC                         |
| P4_ZIKV_FIP         | TGACTCAGTGTCCCTCTGAGGGTTTTTCCTATAGTCAGGCCGAGAA |
| P4_ZIKV_BIP         | GAGGCGCAGGATGGGAAACACAGCTGATCTCCAGTTC          |
| P4_ZIKV_F3          | CTAGTCAGCCACAGCTTG                             |
| P4_ZIKV_B3          | CTAACCACTAGTCCCTCTTCT                          |
| P4_ZIKV_LF          | AGCATGGCTTCTTCCGTG                             |
| P4_ZIKV_LB          | CCTTCCCACCTTCAATC                              |

**Table S2.** Cost analysis of the SP-dChip for ZIKV detection

| Material                                                | Cost per assay |
|---------------------------------------------------------|----------------|
| Polydimethylsiloxane (PDMS)                             | \$1.33         |
| RT-LAMP Master Mix                                      | \$0.89         |
| LAMP Primers                                            | <\$0.01        |
| Mineral oil                                             | \$0.02         |
| Manganese Chloride (MnCl <sub>2</sub> )                 | \$0.01         |
| Calcein                                                 | \$0.25         |
| Microscope slide                                        | \$0.14         |
| Others (aluminum foil, pipette tip, MgCl <sub>2</sub> ) | <\$0.01        |
| <b>Total</b>                                            | <b>\$2.64</b>  |

**Table S3.** Summary of the performance of LAMP-based microfluidic chips

| Device                          | Material    | Target             | Transduction method | Detection limit (copies/ $\mu$ L) |
|---------------------------------|-------------|--------------------|---------------------|-----------------------------------|
| Hongwarittorn 2017 <sup>1</sup> | Paper       | <i>E. coli</i>     | HNB dye             | $4.14 \times 10^3$                |
| Roy 2017 <sup>2</sup>           | Paper       | <i>B. subtilis</i> | Crystal violet      | $2.2 \times 10^3$                 |
| Yao, 2021 <sup>3</sup>          | PDMS        | DENV-4             | Calcein             | 100                               |
| Nguyen, 2022 <sup>4</sup>       | PMMA        | SARS-CoV-2         | SYBR Green I        | 20                                |
| Wen, 2022 <sup>5</sup>          | PMMA        | PEDV               | NEB LAMP dye        | 100                               |
| Hu, 2023 <sup>6</sup>           | PMMA        | WSV                | EvaGreen            | 100                               |
| <b>SP-dChip (this study)</b>    | <b>PDMS</b> | <b>ZIKV</b>        | <b>Calcein</b>      | <b>100</b>                        |

### References

1. I. Hongwarittorn, N. Chaichanawongsaroj and W. Laiwattanapaisal, *Talanta*, 2017, **175**, 135-142.
2. S. Roy, N. F. Mohd-Naim, M. Safavieh and M. U. Ahmed, *ACS Sensors*, 2017, **2**, 1713-1720.
3. Y. Yao, N. Zhao, W. Jing, Q. Liu, H. Lu, W. Zhao, W. Zhao, Z. Yuan, H. Xia and G. Sui, *Sensors and Actuators B: Chemical*, 2021, **333**, 129521.
4. H. V. Nguyen, V. M. Phan and T. S. Seo, *Sensors and Actuators B: Chemical*, 2022, **353**, 131088.
5. S. Wen, J. Zhang, R. Zhao, J. Gao, N. Wang, T. Lu, R. Xie, X. Sun, B. Xiao, Z. Duan and A. Chen, *ACS Agricultural Science & Technology*, 2022, **2**, 805-812.
6. K. Hu, Y. Li, F. Wang, J. Liu, Y. Li, Q. Zhao, X. Zheng, N. Zhu, X. Yu, S. Fang and J. Huang, *Journal of Fish Diseases*, 2023, **46**, 137-146.
